# Supplementary material for: Optimizing total RNA extraction method for human and mice samples
Source: PeerJ. 2024 Sep 26;12:e18072. doi: 10.7717/peerj.18072 (PMC11439393; doi:10.7717/peerj.18072)
Supplement: Supplemental Information 10 [file peerj-12-18072-s010.xlsx]

## Sheet: Sheet1
	Trizol-Ct value	GITC-T-Ct value
GAPDH	35.89	36.48
GAPDH	35.52	34.89
GAPDH	35.18	35.03
GAPDH	36.67	34.07
GAPDH	37.57	34.35
GAPDH	37.47	33.88
GAPDH	36.03	34.21
GAPDH	35.47	33.82
GAPDH	37.63	35.52
	Trizol-Ct value	GITC-T-Ct value
PIRAT1	29.56	29.44
PIRAT1	30.42	29.66
PIRAT1	28.52	30.09
PIRAT1	29.57	28.56
PIRAT1	29.5	28.34
PIRAT1	28.62	28.37
PIRAT1	30.53	29.08
PIRAT1	29.7	28
PIRAT1	30.3	29.03
PIRAT1	28.56	30.21
