# Supplementary material for: Optimizing total RNA extraction method for human and mice samples
Source: PeerJ. 2024 Sep 26;12:e18072. doi: 10.7717/peerj.18072 (PMC11439393; doi:10.7717/peerj.18072)
Supplement: Supplemental Information 11 [file peerj-12-18072-s011.xlsx]

## Sheet: Sheet1
	GITC(3mol/L)	GITC(4mol/L)	GITC(5mol/L)
RNA concentration（ng/uL)	1019.23	1137.02	1135
	1082.16	1105.96	1168.89
	1128.89	1110.85	1103.77
	976.792	1065	1127.72
	1111.09	1111.32	1123.68
	997.949	978.889	1170
	1119.72	1137.02	1135
	1082.16	1027.78	1172.89
	1028.89	1105.96	1194.1
	5%SDS	10%SDS	15%SDS
RNA concentration（ng/uL)	1059.74	1063.86	962.357
	1039.04	1109.36	1111.74
	988.974	1077.14	962.926
	1029.3	1043.86	942.357
	1069.6	1119.36	1121.74
	989.1	1087.14	972.9
	1019.01	1083.86	952.356
	1079.8	1099.36	1141.73
	988	1067.14	962.959
	Trizol	SDS-T	GITC-T	OD260/280	Trizol	SDS-T	GITC-T	OD260/230	Trizol	SDS-T	GITC-T
RNA concentration（ng/uL)	1778.55	1259.91	1993.38		1.96	2.05	2.07		2.14	2.14	2.09
	1673.76	1426.64	1994.99		2.06	2.04	2.04		2.19	2.15	2.02
	1566.94	1220.03	1888.81		2.02	1.97	2.1		2.1	1.93	2.03
	1717.87	1370.22	1805.56		2.02	2.03	2.07		2.19	2.08	2.04
	1498.17	1036.66	1932.56		2.03	2.04	2.06		2.26	2.13	2.06
	1523.3	1144.51	1910.28		2.02	2.05	2.08		2.15	2.13	2.06
	1874.71	1498.54	2180.71		2.03	2.08	2.06		2.18	2.09	2.03
	1478.22	1365.54	2114.9		2	2.05	2.07		1.85	2	2.03
	1672.7	1204.02	2157.5		1.99	2.07	2.05		1.89	2.2	2.04
					Trizol	GITC-T
IntDen-cortex 28S/18S	Trizol	GITC-T		IntDen-cortex 28S+18S	208924	239984
	1.34807	1.88676			204905	228740
	1.28633	2.0537			237469	222271
	1.68082	2.03426			192545	210208
	1.24808	1.906			190973	238771
	1.284	2.1537			189703	216550
	1.787	2.03			178264	241357
	1.3475	1.986			178914	213299
	1.39	1.932			186867	231318
	1.704	2.041
IntDen-U87 28S/18S	Trizol	GITC-T		IntDen-U87 28S+18S	Trizol	GITC-T
	1.26693	0.977301			312108	358871
	0.990551	1.25482			358211	365139
	1.02829	1.35742			327241	360326
	1.26693	0.99675			338657	341261
	0.990551	1.24835			328697	379158
	1.02829	1.25543			344510	369813
	1.28763	1.17256			327978	389153
	0.973421	1.29674			330519	370163
	1.13422	1.22742			337993	341581
IntDen-cortex 28S/18S	5M GITC	4M GITC	3M GITC	IntDen-cortex 28S+18S	5M GITC	4M GITC	3M GITC
	1.56577	1.27058	1.21322		289870	267875	225839
	1.59006	1.37886	1.21814		285726	257624	210145
	1.71217	1.31688	1.20358		288051	260339	201258
	1.58567	1.28106	1.18413		314052	251929	204406
	1.60006	1.35739	1.23581		317927	269711	264883
	1.70121	1.32569	1.22136		289512	259260	256400
	1.66557	1.29352	1.23243		315052	271929	204406
	1.55006	1.35979	1.18281		305237	259711	252883
	1.6314	1.33797	1.21354		299512	259260	256400
IntDen-cortex 28S/18S	15%SDS	10%SDS	5%SDS	IntDen-cortex 28S+18S	15%SDS	10%SDS	5%SDS
	1.25377	1.9934	1.78496		369874	544096	384321
	1.32436	2.36023	1.55424		396322	543809	454243
	1.38031	1.88214	1.8248		387227	570914	350254
	1.27546	1.99034	1.76326		497341	521186	373954
	1.32354	2.14626	1.67454		413667	474547	437068
	1.3621	1.99882	1.74232		402715	537471	449896
	1.26438	1.9987	1.79768		411191	531004	408289
	1.33424	2.2856	1.62454		401391	513004	404289
	1.36301	1.99782	1.70532		421081	552004	412289
