# Supplementary material for: Optimizing total RNA extraction method for human and mice samples
Source: PeerJ. 2024 Sep 26;12:e18072. doi: 10.7717/peerj.18072 (PMC11439393; doi:10.7717/peerj.18072)
Supplement: Supplemental Information 12 [file peerj-12-18072-s012.xls]

## Sheet: Sheet1
ITEM TO CHECK	IMPORTANCE	CHECKLIST
EXPERIMENTAL DESIGN
Definition of experimental and control groups	E	line number:26-28
Number within each group	E	line number:298-299
Assay carried out by core lab or investigator's lab?	D
Acknowledgement of authors' contributions	D
SAMPLE
Description	E	line number:153-157
Volume/mass of sample processed	D
Microdissection or macrodissection	E
Processing procedure	E
If frozen - how and how quickly?	E
If fixed - with what, how quickly?	E
Sample storage conditions and duration (especially for FFPE samples)	E
NUCLEIC ACID EXTRACTION
Procedure and/or instrumentation	E	line number:120-121
Name of kit and details of any modifications	E	line number:120-121
Source of additional reagents used	D
Details of DNase or RNAse treatment	E	line number:150-151
Contamination assessment (DNA or RNA)	E	line number:245-247
Nucleic acid quantification	E
Instrument and method	E	line number:238-247
Purity (A260/A280)	D	line number:245-247
Yield	D	line number:231-233
RNA integrity method/instrument	E	line number:252-268
RIN/RQI or Cq of 3' and 5' transcripts	E
Electrophoresis traces	D
Inhibition testing (Cq dilutions, spike or other)	E
REVERSE TRANSCRIPTION
Complete reaction conditions	E	line number:279-281
Amount of RNA and reaction volume	E
Priming oligonucleotide (if using GSP) and concentration	E
Reverse transcriptase and concentration	E
Temperature and time	E
Manufacturer of reagents and catalogue numbers	D	S1 table
Cqs with and without RT	D*
Storage conditions of cDNA	D
qPCR TARGET INFORMATION
If multiplex, efficiency and LOD of each assay.	E
Sequence accession number	E
Location of amplicon	D
Amplicon length	E
In silico specificity screen (BLAST, etc)	E
Pseudogenes, retropseudogenes or other homologs?	D
Sequence alignment	D
Secondary structure analysis of amplicon	D
Location of each primer by exon or intron (if applicable)	E
What splice variants are targeted?	E
qPCR OLIGONUCLEOTIDES
Primer sequences	E	line number:278
RTPrimerDB Identification Number	D	line number:272-276
Probe sequences	D**
Location and identity of any modifications	E
Manufacturer of oligonucleotides	D
Purification method	D
qPCR PROTOCOL
Complete reaction conditions	E	line number:285-287
Reaction volume and amount of cDNA/DNA	E	line number:282-283
Primer, (probe), Mg++ and dNTP concentrations	E
Polymerase identity and concentration	E	S1 table
Buffer/kit identity and manufacturer	E
Exact chemical constitution of the buffer	D
Additives (SYBR Green I, DMSO, etc.)	E
Manufacturer of plates/tubes and catalog number	D
Complete thermocycling parameters	E	line number:285-287
Reaction setup (manual/robotic)	D
Manufacturer of qPCR instrument	E	line number:124-125
qPCR VALIDATION
Evidence of optimisation (from gradients)	D
Specificity (gel, sequence, melt, or digest)	E	S3 table
For SYBR Green I, Cq of the NTC	E	line number:282-283
Standard curves with slope and y-intercept	E	line number:270-279
PCR efficiency calculated from slope	E
Confidence interval for PCR efficiency or standard error	D
r2 of standard curve	E
Linear dynamic range	E
Cq variation at lower limit	E	line number:270-279
Confidence intervals throughout range	D
Evidence for limit of detection	E
If multiplex, efficiency and LOD of each assay.	E
DATA ANALYSIS
qPCR analysis program (source, version)	E
Cq method determination	E	line number:270-279
Outlier identification and disposition	E
Results of NTCs	E
Justification of number and choice of reference genes	E
Description of normalisation method	E
Number and concordance of biological replicates	D
Number and stage (RT or qPCR) of technical replicates	E
Repeatability (intra-assay variation)	E
Reproducibility (inter-assay variation, %CV)	D
Power analysis	D
Statistical methods for result significance	E	line number:301
Software (source, version)	E	line number:305
Cq or raw data submission using RDML	D
Table 1. MIQE checklist for authors, reviewers and editors. All essential information (E) must be submitted with the manuscript. Desirable
information (D) should be submitted if available. If using primers obtained from RTPrimerDB, information on qPCR target, oligonucleotides,
protocols and validation is available from that source.
*: Assessing the absence of DNA using a no RT assay is essential when first extracting RNA. Once the sample has been validated as
RDNA-free, inclusion of a no-RT control is desirable, but no longer essential.
**: Disclosure of the probe sequence is highly desirable and strongly encouraged. However, since not all commercial pre-designed assay
vendors provide this information, it cannot be an essential requirement. Use of such assays is advised against.
