# Supplementary material for: Optimizing total RNA extraction method for human and mice samples
Source: PeerJ journal article supplement (doi:10.7717/peerj.18072), 2024-09-26

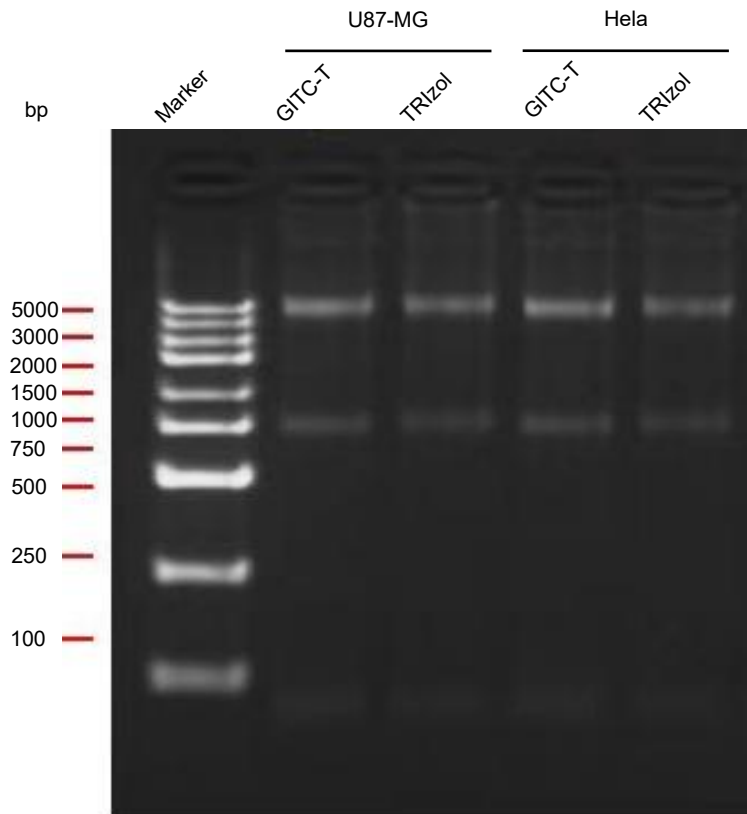

Supplement: Supplementary_Figure_3.pdf [file Supplementary_Figure_3.pdf]
